# Supplementary material
Source: PubMed Central journal article supplement (PMC1100766)
Supplement: pnas_102_19_6849__1.pdf [file pnas_102_19_6849__1.pdf]

**Table 4. <sup>1</sup>H resonance assignments for bovine immunodeficiency virus (BIV) TAR at 15°C for nonexchangeable protons and 10°C for exchangeable protons**

| <b>Residues</b> | <b>H8/H6</b> | <b>H5/H2</b> | <b>H1'</b> | <b>H2'</b> | <b>H3'</b> | <b>H4'</b> | <b>H5'/H5''</b> | <b>amino</b> | <b>imino</b> |
|-----------------|--------------|--------------|------------|------------|------------|------------|-----------------|--------------|--------------|
| G4              | 8.21         | NA           | 5.83       | 4.92       | 4.77       | 4.58       | 4.3/4.46        |              |              |
| G5              | 7.61         | NA           | 5.95       | 4.61       | 4.54       |            |                 |              | 13.71        |
| C6              | 7.72         | 5.29         | 5.58       | 4.47       |            |            |                 | 6.98/8.66    | NA           |
| U7              | 7.90         | 5.46         | 5.59       | 4.68       | 4.54       |            |                 | NA           | 14.11        |
| C8              | 7.69         | 5.53         | 5.39       | 4.30       | 4.49       | 4.42       |                 | 6.96/8.21    | NA           |
| G9              | 7.78         | NA           | 5.95       | 4.18       | 4.86       |            |                 | 6.00/7.22    | 12.81        |
| U10             | 7.42         | 5.44         | 5.98       | 4.49       | 4.58       | 4.72       | 3.93/4.24       | NA           | 13.32        |
| G11             | 7.76         | NA           | 5.99       | 4.62       | 4.95       | 4.63       |                 | 5.99/7.85    | 12.23        |
| U12             | 7.89         | 6.00         | 5.98       | 4.59       | 4.68       |            |                 |              |              |
| A13             | 7.88         | 7.08         | 5.97       | 5.01       | 4.50       | 4.60       | 4.28/4.43       | 7.85/8.65    | NA           |
| G14             | 7.84         | NA           | 6.02       | 4.79       |            |            |                 | 6.45/8.85    | 13.78        |
| C15             | 7.30         | 5.4          | 5.55       | 4.33       |            |            |                 | 7.02/8.57    | NA           |
| U16             | 7.54         | 5.39         | 5.79       | 4.43       | 4.34       |            |                 | NA           | 14.37        |
| C17             | 7.84         | 5.88         | 5.68       | 4.22       | 4.44       | 4.34       | 4.05/4.18       |              | NA           |
| A18             | 8.35         | 8.15         | 5.99       | 4.69       | 4.51       |            | 4.05/4.17       |              | NA           |
| U19             | 7.54         | 5.68         | 5.68       | 4.23       | 4.58       |            | 3.94/4.05       | NA           |              |
| U20             | 7.80         | 5.87         | 6.00       | 4.43       |            |            |                 | NA           |              |
| A21             | 8.49         | 7.75         | 6.08       | 4.97       | 4.85       | 4.57       | 4.26/4.30       | 7.09/7.50    | NA           |
| G22             | 7.39         | NA           | 5.74       | 4.35       | 4.06       | 4.50       | 4.25            | 6.20/8.80    | 13.16        |
| C23             | 7.53         | 5.34         | 5.65       | 4.49       | 4.47       |            | 4.23            | 7.29/9.08    | NA           |
| U24             | 7.83         | 4.74         | 5.63       | 4.74       |            |            |                 |              | 14.27        |
| C25             | 7.47         | 5.56         | 5.18       | 4.46       | 4.21       | 4.47       | 4.06/4.53       | 6.43/8.03    | NA           |
| C26             | 7.85         | 5.52         | 5.44       | 4.59       |            |            |                 | 6.89/8.69    | NA           |
| G27             | 7.40         | NA           | 5.59       | 4.46       |            |            |                 |              | 12.11        |
| A28             | 7.67         | 7.33         | 5.87       | 4.65       | 4.58       | 4.34       | 4.06/4.18       | 6.67/7.72    | NA           |
| G29             | 7.20         | NA           | 5.68       | 4.46       | 4.43       | NA         | 4.06            | 6.26/8.46    | 13.42        |
| C30             | 7.61         | 5.18         | 5.54       | 4.30       |            |            | 4.05            |              | NA           |
| C31             | 7.69         | 5.54         | 5.79       | 4.03       | 4.20       |            |                 |              | NA           |

NA, not available.
