# Supplementary material
Source: PubMed Central journal article supplement (PMC1100766)
Supplement: pnas_102_19_6849__2.pdf [file pnas_102_19_6849__2.pdf]

**Table 5. <sup>1</sup>H resonance assignments for Jembrana disease virus (JDV) Tat at 15°C**

| Residues          | NH   | αH        | βH        | Others                                                                                       |
|-------------------|------|-----------|-----------|----------------------------------------------------------------------------------------------|
| Gly <sub>65</sub> | 8.27 | 3.79      | n/a       |                                                                                              |
| Arg <sub>66</sub> | 8.28 | 4.11      | 1.59/1.66 | γCH <sub>2</sub> 1.37/1.49<br>δCH <sub>2</sub> 3.00<br>NH 7.12                               |
| Arg <sub>67</sub> | 8.53 | 4.16      | 1.73/1.64 | γCH <sub>2</sub> 1.46/1.51<br>δCH <sub>2</sub> 2.95<br>NH 7.11                               |
| Lys <sub>68</sub> | 8.21 | 4.31      | 1.62/1.74 | γCH <sub>2</sub> 1.23<br>δCH <sub>2</sub> 1.29<br>εCH <sub>2</sub> 2.59                      |
| Lys <sub>69</sub> | 8.59 | 4.23      | 1.63/1.76 | γCH <sub>2</sub> 1.23<br>δCH <sub>2</sub> 1.32/1.40<br>εCH <sub>2</sub> 2.70/2.96<br>NH 7.44 |
| Arg <sub>70</sub> |      | 4.72      | 1.59      | γCH <sub>2</sub> 1.59<br>δCH <sub>2</sub> 2.82/2.96<br>NH 7.99                               |
| Gly <sub>71</sub> |      | 3.86/4.32 | n/a       |                                                                                              |
| Thr <sub>72</sub> | 7.32 | 4.96      | 3.86      | γCH <sub>3</sub> 0.94<br>γCH <sub>2</sub> 1.23/1.62<br>OH 6.17                               |
| Arg <sub>73</sub> | 7.84 | 4.86      | 1.40/1.95 | γCH <sub>2</sub> 1.22/1.60<br>δCH <sub>2</sub> 2.86/2.97<br>NH 7.49                          |
| Gly <sub>74</sub> | 7.39 | 3.43/3.35 | n/a       |                                                                                              |
| Lys <sub>75</sub> | 8.30 | 3.96      | 1.99      | γCH <sub>2</sub> 1.43<br>δCH <sub>2</sub> 1.61/1.75<br>εCH <sub>2</sub> 3.04<br>NH 7.55      |
| Gly <sub>76</sub> | 8.97 | 3.59/4.02 | n/a       |                                                                                              |
| Arg <sub>77</sub> | 8.19 | 4.26      | 1.62/1.78 | γCH <sub>2</sub> 1.40<br>δCH <sub>2</sub> 2.91/3.24<br>NH 6.94                               |
| Lys <sub>78</sub> | 8.44 | 3.96      | 1.67/1.73 | γCH <sub>2</sub> 1.34<br>δCH <sub>2</sub> 1.48<br>εCH <sub>2</sub> 3.16<br>NH 7.76           |
| Ile <sub>79</sub> | 7.49 | 3.79      | 1.18      | γCH <sub>2</sub> 0.60/0.70<br>γCH <sub>3</sub> 0.16<br>δCH <sub>2</sub> 1.38                 |
| His <sub>80</sub> | 9.30 | 4.65      | 3.19      | δCH 7.31<br>εCH 8.48                                                                         |
| Tyr <sub>81</sub> | 8.54 | 4.78      | 2.78/3.12 | δCH 6.17/7.15<br>εCH 6.72/6.92                                                               |
