# Supplementary material
Source: PubMed Central journal article supplement (PMC1100766)
Supplement: pnas_102_19_6849__3.pdf [file pnas_102_19_6849__3.pdf]

**Table 6. Intermolecular NOEs in the bovine immunodeficiency virus (BIV) TAR-Jembrana disease virus (JDV) Tat complex**

| Amino acids | Protons                                          | Nucleotides                                                   |
|-------------|--------------------------------------------------|---------------------------------------------------------------|
| G65         | NH                                               | A18 H1', U19H1'                                               |
|             | $\alpha$ CH <sub>2</sub>                         | A18 (H8, H2, H1'), U19H5, U20 (H6, H5)                        |
| R66         | $\beta$ CH <sub>2</sub>                          | A18H8                                                         |
|             | $\gamma$ CH <sub>2</sub>                         | C17 (H5, H1'), A18 (H8, H2)                                   |
|             | $\delta$ CH <sub>2</sub>                         | C17H5, A18H2                                                  |
| R67         | $\beta$ CH <sub>2</sub>                          | C17 (H5, H1'), A18H2                                          |
| K68         | $\beta$ CH <sub>2</sub> $\gamma$ CH <sub>2</sub> | A18H2, U20 (H6, H1')                                          |
| K69         | $\beta$ CH <sub>2</sub>                          | U16H5                                                         |
|             | $\gamma$ CH <sub>2</sub>                         | U19H1', G22NH1                                                |
|             | $\delta$ CH <sub>2</sub>                         | U16H5, U20H1'                                                 |
|             | $\epsilon$ CH <sub>2</sub>                       | U16H5, C17H5, A18H2, U19 (H6, H1', H3'), U20H1', A21 (H8, H2) |
|             | NH <sub>3</sub> <sup>+</sup>                     | U19H1'                                                        |
| R70         | $\beta$ CH <sub>2</sub>                          | U10H5, G14H8, G22NH1, C23H4' U24H3                            |
|             | $\gamma$ CH <sub>2</sub>                         | A13NH2, G14 (H8, NH1), C15 (H5, NH2), G22NH1, C23NH2          |
|             | $\delta$ CH <sub>2</sub>                         | U10H5, A13NH2, C15H5, C23NH2, U24NH3                          |
|             | $\epsilon$ CH <sub>2</sub>                       | A13NH2, G14NH1, C15NH2, U24NH3                                |
| G71         | $\alpha$ CH <sub>2</sub>                         | A21H8, C23 (H5, NH2)                                          |
| T72         | NH                                               | C23NH2                                                        |
|             | $\beta$ H                                        | G22H8, C23H6                                                  |
|             | $\gamma$ CH <sub>3</sub>                         | A21 (H8, H1'), G22 (H8, H2', H3', H5')                        |
|             |                                                  | C23 (H6, H5, NH2)                                             |
|             | $\gamma$ OH <sub>2</sub>                         | C23 (H6, H5)                                                  |
| R73         | NH                                               | C23H6                                                         |
|             | $\beta$ CH <sub>2</sub>                          | G9NH1, G11NH1, U24NH3, C25NH2, C26NH2                         |
|             | $\gamma$ CH <sub>2</sub>                         | G11NH2, C25NH2                                                |
|             | $\delta$ CH <sub>2</sub>                         | G9 (H8, NH1), G11NH1, C25NH2, C26NH2                          |
|             | $\epsilon$ CH <sub>2</sub>                       | G9NH1, C25NH2                                                 |
| G74         | NH                                               | C23 (H5, NH2), U24H5                                          |
|             | $\alpha$ CH <sub>2</sub>                         | C23 (H6, H5, H2'), U24 (H6, H5)                               |
| K75         | NH                                               | C23H6, U24H6                                                  |
|             | $\delta$ CH <sub>2</sub>                         | C23H6                                                         |
| G76         | NH                                               | C23H5                                                         |
| R77         | $\beta$ CH <sub>2</sub>                          | C8 (H6, H5), C26NH2                                           |
|             | $\gamma$ CH <sub>2</sub>                         | C8H5                                                          |
|             | $\delta$ CH <sub>2</sub>                         | U7H6, C8 (H6, H5), C25H6, C26NH2                              |
| K78         | $\epsilon$ CH <sub>2</sub>                       | C8H2', G9H3'                                                  |
| I79         | $\alpha$ H, $\beta$ H                            | U10 (H6, H5)                                                  |
|             | $\gamma$ CH <sub>2</sub>                         | U10 (H6, H5, H5', H5''), U24 (H5, NH3)                        |
|             | $\gamma$ CH <sub>3</sub>                         | G9 (H8, H3'), U10 (H6, H5, H1', H3', H5')                     |
|             | $\delta$ CH <sub>3</sub>                         | U10 (H6, H5)                                                  |
| Y81         | $\alpha$ H                                       | U10H5                                                         |
|             | $\delta$ 1CH                                     | U10 (H6, H2')                                                 |
|             | $\epsilon$ 1CH                                   | U10 (H6, H5, H2', NH3)                                        |
|             | $\epsilon$ 2CH                                   | U10NH3                                                        |
